# Supplementary material for: Whole genome sequencing of Aoluguya reindeer (Rangifer tarandus) in China
Source: Front Genet. 2023 Aug 2;14:1243795. doi: 10.3389/fgene.2023.1243795 (PMC10433215; doi:10.3389/fgene.2023.1243795)
Supplement: Supplementary file 1 [file Table2.XLSX]

## Sheet: 10Fig
#Dist	Mean_r^2	Sum_r^2	NumberPairs
10	0.669108	483554	722684
20	0.597694	381054	637541
30	0.569731	345746	606858
40	0.550472	324742	589933
50	0.538451	308441	572831
60	0.529368	298473	563830
70	0.52332	292143	558248
80	0.517396	284257	549399
90	0.513385	280300	545985
100	0.510663	276456	541367
200	0.497775	2.60726e+06	5237828
300	0.485787	2.45457e+06	5052770
400	0.477506	2.36017e+06	4942705
500	0.470751	2.29406e+06	4873199
600	0.465137	2.24101e+06	4817954
700	0.459819	2.1959e+06	4775573
800	0.455352	2.15878e+06	4740901
900	0.4506	2.12065e+06	4706289
1000	0.446687	2.08815e+06	4674744
1100	0.441993	2.05328e+06	4645502
1200	0.438659	2.02732e+06	4621625
1300	0.434891	1.99949e+06	4597684
1400	0.431428	1.96889e+06	4563660
1500	0.427942	1.94628e+06	4547997
1600	0.424247	1.91884e+06	4522929
1700	0.420839	1.89402e+06	4500592
1800	0.417658	1.87361e+06	4485994
1900	0.414834	1.85558e+06	4473062
2000	0.411818	1.83282e+06	4450557
2100	0.408699	1.81356e+06	4437400
2200	0.40585	1.79212e+06	4415713
2300	0.40336	1.7765e+06	4404254
2400	0.400612	1.76098e+06	4395717
2500	0.398388	1.74453e+06	4378970
2600	0.395679	1.7267e+06	4363888
2700	0.393279	1.71074e+06	4349924
2800	0.390609	1.69294e+06	4334099
2900	0.388898	1.6808e+06	4321954
3000	0.386301	1.66671e+06	4314533
3100	0.38416	1.65181e+06	4299803
3200	0.3827	1.64046e+06	4286545
3300	0.380295	1.62605e+06	4275745
3400	0.378081	1.61251e+06	4264976
3500	0.376316	1.601e+06	4254410
3600	0.374244	1.58662e+06	4239541
3700	0.372789	1.57822e+06	4233559
3800	0.371188	1.56672e+06	4220820
3900	0.369365	1.55723e+06	4215950
4000	0.367764	1.54787e+06	4208859
4100	0.365413	1.53608e+06	4203677
4200	0.363845	1.52714e+06	4197215
4300	0.362851	1.51834e+06	4184470
4400	0.360781	1.5106e+06	4187030
4500	0.358996	1.4988e+06	4174981
4600	0.357758	1.4894e+06	4163145
4700	0.356487	1.48334e+06	4161001
4800	0.355041	1.47246e+06	4147307
4900	0.353839	1.46453e+06	4138971
5000	0.352067	1.45411e+06	4130198
5100	0.351197	1.44969e+06	4127855
5200	0.349266	1.43944e+06	4121329
5300	0.347824	1.43101e+06	4114190
5400	0.347024	1.42791e+06	4114732
5500	0.345718	1.41741e+06	4099889
5600	0.344168	1.41013e+06	4097216
5700	0.343293	1.40524e+06	4093410
5800	0.342349	1.39875e+06	4085740
5900	0.34135	1.39151e+06	4076501
6000	0.339908	1.38486e+06	4074219
6100	0.339114	1.37988e+06	4069082
6200	0.337738	1.37476e+06	4070496
6300	0.336472	1.36559e+06	4058560
6400	0.335641	1.36194e+06	4057718
6500	0.334619	1.3537e+06	4045498
6600	0.333894	1.35111e+06	4046528
6700	0.333555	1.34887e+06	4043922
6800	0.331945	1.34034e+06	4037851
6900	0.33133	1.33612e+06	4032614
7000	0.330296	1.3283e+06	4021539
7100	0.329719	1.32642e+06	4022873
7200	0.32873	1.32124e+06	4019220
7300	0.327962	1.31667e+06	4014698
7400	0.326882	1.31222e+06	4014354
7500	0.326034	1.30805e+06	4011992
7600	0.325301	1.30322e+06	4006195
7700	0.324749	1.29844e+06	3998297
7800	0.323641	1.29236e+06	3993188
7900	0.323003	1.28977e+06	3993062
8000	0.322404	1.28573e+06	3987934
8100	0.321429	1.28051e+06	3983813
8200	0.320865	1.27837e+06	3984139
8300	0.320463	1.27375e+06	3974710
8400	0.319722	1.27162e+06	3977283
8500	0.318969	1.26765e+06	3974215
8600	0.318399	1.26292e+06	3966474
8700	0.317408	1.25928e+06	3967380
8800	0.316858	1.25589e+06	3963561
8900	0.315997	1.25176e+06	3961295
9000	0.315588	1.25028e+06	3961751
9100	0.314804	1.24539e+06	3956091
9200	0.31462	1.24222e+06	3948328
9300	0.313743	1.23973e+06	3951419
9400	0.313014	1.23609e+06	3949001
9500	0.312214	1.23145e+06	3944259
9600	0.311971	1.22988e+06	3942278
9700	0.311464	1.22602e+06	3936313
9800	0.310854	1.22216e+06	3931614
9900	0.310251	1.22058e+06	3934162
10000	0.309827	1.21756e+06	3929808
10100	0.309458	1.21516e+06	3926732
10200	0.308977	1.21219e+06	3923225
10300	0.30853	1.20907e+06	3918795
10400	0.308149	1.20854e+06	3921927
10500	0.307694	1.20697e+06	3922629
10600	0.307342	1.20424e+06	3918248
10700	0.306674	1.19908e+06	3909960
10800	0.306082	1.19883e+06	3916684
10900	0.305742	1.19669e+06	3914047
11000	0.305397	1.1942e+06	3910329
11100	0.304908	1.19168e+06	3908335
11200	0.304142	1.18827e+06	3906953
11300	0.303235	1.18403e+06	3904663
11400	0.303149	1.18317e+06	3902935
11500	0.30312	1.18078e+06	3895405
11600	0.302825	1.17877e+06	3892568
11700	0.302159	1.17692e+06	3895030
11800	0.30156	1.17222e+06	3887169
11900	0.301525	1.17049e+06	3881899
12000	0.301276	1.17108e+06	3887079
12100	0.300799	1.16788e+06	3882588
12200	0.300259	1.16561e+06	3882015
12300	0.29973	1.16122e+06	3874209
12400	0.299423	1.15988e+06	3873723
12500	0.299337	1.16077e+06	3877815
12600	0.298722	1.1574e+06	3874507
12700	0.298498	1.15527e+06	3870279
12800	0.298216	1.15372e+06	3868728
12900	0.297485	1.15127e+06	3870005
13000	0.297418	1.14999e+06	3866565
13100	0.297423	1.15026e+06	3867406
13200	0.297044	1.14737e+06	3862614
13300	0.29648	1.14499e+06	3861942
13400	0.296404	1.14426e+06	3860461
13500	0.296095	1.14272e+06	3859288
13600	0.295902	1.14047e+06	3854212
13700	0.295677	1.14107e+06	3859194
13800	0.29515	1.13774e+06	3854789
13900	0.295083	1.13874e+06	3859042
14000	0.294685	1.1356e+06	3853604
14100	0.294306	1.13419e+06	3853787
14200	0.294009	1.13056e+06	3845342
14300	0.294119	1.13067e+06	3844254
14400	0.29353	1.12819e+06	3843526
14500	0.293235	1.12717e+06	3843926
14600	0.292703	1.12522e+06	3844225
14700	0.292551	1.1235e+06	3840339
14800	0.292253	1.1215e+06	3837420
14900	0.292278	1.12059e+06	3833987
15000	0.291717	1.11872e+06	3834955
15100	0.291683	1.11868e+06	3835247
15200	0.29128	1.11563e+06	3830079
15300	0.290977	1.11423e+06	3829273
15400	0.290623	1.11158e+06	3824821
15500	0.290106	1.11056e+06	3828128
15600	0.290358	1.11126e+06	3827217
15700	0.290051	1.11126e+06	3831253
15800	0.289713	1.10959e+06	3829965
15900	0.289492	1.10886e+06	3830367
16000	0.289381	1.10629e+06	3822954
16100	0.289132	1.10622e+06	3826002
16200	0.28867	1.10311e+06	3821339
16300	0.288973	1.10404e+06	3820548
16400	0.28822	1.10157e+06	3821963
16500	0.288208	1.10152e+06	3821960
16600	0.288181	1.10104e+06	3820655
16700	0.288281	1.10089e+06	3818810
16800	0.287955	1.09923e+06	3817370
16900	0.287843	1.09898e+06	3817992
17000	0.287612	1.0974e+06	3815543
17100	0.28699	1.09392e+06	3811721
17200	0.286822	1.09466e+06	3816522
17300	0.28666	1.09289e+06	3812487
17400	0.286735	1.09226e+06	3809307
17500	0.286437	1.09078e+06	3808113
17600	0.28636	1.09047e+06	3808024
17700	0.285981	1.08946e+06	3809560
17800	0.285589	1.08772e+06	3808699
17900	0.285384	1.08628e+06	3806381
18000	0.285396	1.08719e+06	3809419
18100	0.28505	1.08493e+06	3806089
18200	0.285148	1.08477e+06	3804231
18300	0.284908	1.08392e+06	3804439
18400	0.284268	1.08239e+06	3807656
18500	0.28401	1.07912e+06	3799572
18600	0.284189	1.08081e+06	3803131
18700	0.283744	1.0778e+06	3798478
18800	0.283866	1.07886e+06	3800599
18900	0.283444	1.07676e+06	3798853
19000	0.283386	1.07636e+06	3798203
19100	0.282779	1.0744e+06	3799416
19200	0.282625	1.0727e+06	3795491
19300	0.282809	1.07286e+06	3793591
19400	0.282815	1.07368e+06	3796421
19500	0.283028	1.07343e+06	3792686
19600	0.28263	1.07112e+06	3789841
19700	0.282245	1.07086e+06	3794062
19800	0.281594	1.06726e+06	3790065
19900	0.28115	1.06609e+06	3791893
20000	0.281274	1.06652e+06	3791748
20100	0.281267	1.06726e+06	3794462
20200	0.281544	1.06848e+06	3795065
20300	0.280857	1.06497e+06	3791848
20400	0.281013	1.06372e+06	3785293
20500	0.280786	1.06303e+06	3785899
20600	0.280586	1.06262e+06	3787160
20700	0.280513	1.06135e+06	3783603
20800	0.280573	1.06133e+06	3782727
20900	0.28045	1.06099e+06	3783166
21000	0.280059	1.05861e+06	3779960
21100	0.280048	1.06056e+06	3787056
21200	0.280175	1.05954e+06	3781711
21300	0.279821	1.05865e+06	3783310
21400	0.28021	1.0586e+06	3777883
21500	0.279849	1.0578e+06	3779905
21600	0.279764	1.05799e+06	3781708
21700	0.27957	1.05714e+06	3781303
21800	0.279591	1.05579e+06	3776200
21900	0.279081	1.05454e+06	3778601
22000	0.278802	1.05235e+06	3774557
22100	0.27864	1.05038e+06	3769663
22200	0.278551	1.04871e+06	3764878
22300	0.278474	1.04931e+06	3768080
22400	0.278523	1.04842e+06	3764217
22500	0.278202	1.04783e+06	3766443
22600	0.278172	1.04783e+06	3766842
22700	0.277866	1.0465e+06	3766203
22800	0.277724	1.04609e+06	3766653
22900	0.277557	1.04606e+06	3768827
23000	0.277387	1.04407e+06	3763948
23100	0.277471	1.04401e+06	3762606
23200	0.277567	1.04482e+06	3764211
23300	0.277399	1.04282e+06	3759297
23400	0.277435	1.0434e+06	3760879
23500	0.27731	1.04258e+06	3759608
23600	0.276793	1.03925e+06	3754615
23700	0.276796	1.03814e+06	3750544
23800	0.276721	1.03974e+06	3757372
23900	0.276471	1.03808e+06	3754753
24000	0.275918	1.037e+06	3758382
24100	0.275883	1.03628e+06	3756225
24200	0.275543	1.03407e+06	3752864
24300	0.275641	1.035e+06	3754866
24400	0.275583	1.03304e+06	3748573
24500	0.275455	1.03339e+06	3751571
24600	0.2755	1.0326e+06	3748111
24700	0.275144	1.03151e+06	3748970
24800	0.27498	1.03095e+06	3749175
24900	0.274907	1.03056e+06	3748759
25000	0.274705	1.02969e+06	3748342
25100	0.274934	1.02993e+06	3746105
25200	0.274358	1.02785e+06	3746375
25300	0.27443	1.0264e+06	3740114
25400	0.274653	1.02981e+06	3749505
25500	0.274508	1.02917e+06	3749153
25600	0.274206	1.0268e+06	3744650
25700	0.274259	1.02796e+06	3748127
25800	0.273766	1.02435e+06	3741694
25900	0.273699	1.02404e+06	3741478
26000	0.273578	1.02365e+06	3741696
26100	0.273501	1.02386e+06	3743545
26200	0.273602	1.02315e+06	3739560
26300	0.273344	1.02213e+06	3739354
26400	0.273285	1.02233e+06	3740909
26500	0.273317	1.02448e+06	3748320
26600	0.273463	1.02272e+06	3739894
26700	0.273332	1.02203e+06	3739143
26800	0.272846	1.0195e+06	3736527
26900	0.273018	1.02138e+06	3741079
27000	0.273154	1.02044e+06	3735756
27100	0.272883	1.01832e+06	3731703
27200	0.272631	1.0173e+06	3731420
27300	0.272654	1.01824e+06	3734566
27400	0.272546	1.01838e+06	3736543
27500	0.272146	1.01566e+06	3732030
27600	0.272721	1.01888e+06	3735981
27700	0.272422	1.01949e+06	3742304
27800	0.272029	1.0177e+06	3741160
27900	0.272121	1.01749e+06	3739091
28000	0.271942	1.01578e+06	3735291
28100	0.27175	1.0149e+06	3734691
28200	0.271975	1.01597e+06	3735543
28300	0.271908	1.01577e+06	3735735
28400	0.271972	1.01613e+06	3736147
28500	0.271363	1.01397e+06	3736567
28600	0.271275	1.01318e+06	3734877
28700	0.271446	1.01331e+06	3733028
28800	0.271366	1.01329e+06	3734027
28900	0.271525	1.01462e+06	3736735
29000	0.271411	1.0139e+06	3735667
29100	0.271043	1.01161e+06	3732285
29200	0.270993	1.01173e+06	3733404
29300	0.271143	1.01134e+06	3729905
29400	0.270839	1.00967e+06	3727930
29500	0.270373	1.00935e+06	3733174
29600	0.27048	1.01096e+06	3737655
29700	0.270632	1.01132e+06	3736892
29800	0.270673	1.00871e+06	3726663
29900	0.270289	1.00874e+06	3732073
30000	0.270439	1.00831e+06	3728417
30100	0.27004	1.00692e+06	3728795
30200	0.269872	1.00722e+06	3732208
30300	0.269675	1.00534e+06	3727987
30400	0.269969	1.00627e+06	3727369
30500	0.270054	1.00525e+06	3722400
30600	0.269973	1.00544e+06	3724224
30700	0.26988	1.00471e+06	3722813
30800	0.269639	1.00301e+06	3719824
30900	0.269661	1.00133e+06	3713305
31000	0.269543	1.00159e+06	3715895
31100	0.269748	1.00306e+06	3718515
31200	0.269506	1.002e+06	3717904
31300	0.26938	1.00178e+06	3718819
31400	0.269118	1.00083e+06	3718935
31500	0.269301	1.00208e+06	3721050
31600	0.268955	1.00077e+06	3720942
31700	0.268977	1.00107e+06	3721772
31800	0.269049	1.00091e+06	3720183
31900	0.268911	1.00041e+06	3720214
32000	0.268693	998323	3715484
32100	0.268594	997662	3714387
32200	0.26858	997229	3712963
32300	0.268726	997170	3710735
32400	0.268573	996531	3710460
32500	0.268647	997284	3712246
32600	0.268434	996379	3711815
32700	0.268508	995777	3708550
32800	0.26844	995537	3708608
32900	0.268304	994642	3707151
33000	0.268287	993605	3703512
33100	0.26813	993101	3703799
33200	0.267735	991655	3703865
33300	0.267868	993401	3708549
33400	0.267549	991686	3706564
33500	0.267834	993136	3708035
33600	0.26728	991825	3710803
33700	0.267046	990390	3708692
33800	0.26756	992339	3708844
33900	0.267126	990241	3707023
34000	0.267361	991405	3708111
34100	0.267461	991878	3708496
34200	0.266721	989011	3708037
34300	0.267297	989051	3700203
34400	0.267069	988203	3700175
34500	0.266831	988152	3703288
34600	0.266858	987813	3701638
34700	0.266817	986635	3697801
34800	0.26693	987900	3700971
34900	0.266552	986269	3700099
35000	0.266713	987124	3701070
35100	0.266674	986875	3700674
35200	0.26636	985552	3700081
35300	0.26653	985926	3699115
35400	0.266363	985270	3698979
35500	0.266073	984346	3699540
35600	0.266297	984253	3696076
35700	0.266446	984471	3694823
35800	0.265765	983421	3700342
35900	0.265577	982235	3698493
36000	0.265808	982326	3695624
36100	0.265592	981086	3693966
36200	0.266112	982746	3692981
36300	0.266081	981895	3690209
36400	0.265757	981330	3692587
36500	0.26598	981465	3690002
36600	0.265557	980258	3691330
36700	0.265576	981809	3696911
36800	0.265413	980691	3694963
36900	0.265252	980052	3694795
37000	0.265292	980289	3695135
37100	0.265015	979646	3696569
37200	0.265054	979175	3694240
37300	0.264745	978408	3695664
37400	0.264672	977072	3691633
37500	0.264391	974505	3685856
37600	0.264775	976635	3688545
37700	0.264378	975406	3689441
37800	0.264629	977784	3694929
37900	0.264559	975941	3688929
38000	0.264653	976757	3690714
38100	0.265029	978079	3690456
38200	0.26439	974932	3687480
38300	0.264544	975600	3687850
38400	0.264577	975532	3687138
38500	0.264371	976190	3692505
38600	0.264168	976285	3695694
38700	0.264367	975849	3691271
38800	0.264443	975122	3687457
38900	0.263981	973579	3688060
39000	0.264429	976452	3692687
39100	0.263624	972732	3689852
39200	0.263714	972466	3687571
39300	0.26375	972806	3688363
39400	0.263826	972898	3687644
39500	0.263693	972380	3687542
39600	0.263749	972762	3688213
39700	0.263458	970351	3683128
39800	0.263612	970980	3683368
39900	0.263641	972552	3688918
40000	0.263606	971785	3686505
40100	0.26343	970601	3684479
40200	0.263401	971201	3687153
40300	0.262999	970451	3689940
40400	0.263279	971228	3688968
40500	0.263429	970511	3684153
40600	0.263017	969123	3684644
40700	0.263236	971062	3688947
40800	0.262697	968020	3684937
40900	0.262806	968260	3684314
41000	0.262709	968106	3685090
41100	0.262692	968626	3687308
41200	0.262589	967381	3684019
41300	0.262522	966287	3680785
41400	0.262388	967078	3685683
41500	0.262948	967602	3679821
41600	0.262592	966961	3682371
41700	0.262664	966384	3679169
41800	0.262398	964568	3675975
41900	0.26233	965085	3678895
42000	0.262192	965489	3682374
42100	0.262738	966370	3678077
42200	0.262805	966967	3679411
42300	0.262536	965547	3677770
42400	0.262447	965616	3679277
42500	0.262312	964079	3675316
42600	0.262513	965267	3677030
42700	0.262323	965063	3678909
42800	0.26204	964604	3681131
42900	0.262202	965056	3680586
43000	0.261934	964655	3682811
43100	0.262011	964484	3681081
43200	0.26188	963321	3678484
43300	0.261554	962274	3679059
43400	0.261853	963331	3678897
43500	0.261288	962333	3683033
43600	0.261871	963332	3678649
43700	0.261339	962132	3681547
43800	0.261793	962321	3675879
43900	0.261687	962414	3677737
44000	0.261759	962799	3678193
44100	0.262062	963475	3676519
44200	0.261498	961839	3678187
44300	0.261553	962899	3681475
44400	0.261362	961033	3677012
44500	0.261186	960296	3676670
44600	0.261265	961590	3680516
44700	0.260747	959673	3680474
44800	0.260651	958313	3676620
44900	0.261058	960560	3679492
45000	0.261322	960306	3674794
45100	0.26129	961370	3679323
45200	0.260911	960980	3683177
45300	0.260861	959197	3677037
45400	0.260994	958927	3674142
45500	0.261002	961100	3682343
45600	0.260498	958207	3678367
45700	0.260492	958494	3679559
45800	0.26049	957965	3677558
45900	0.260325	957994	3679986
46000	0.260053	955908	3675827
46100	0.260152	955168	3671576
46200	0.260121	954780	3670517
46300	0.260135	955603	3673486
46400	0.260158	954935	3670591
46500	0.259873	953948	3670820
46600	0.259637	952216	3667497
46700	0.25989	953267	3667967
46800	0.259647	953595	3672654
46900	0.259643	954386	3675758
47000	0.259817	953417	3669578
47100	0.259425	952480	3671509
47200	0.259663	952691	3668955
47300	0.25904	951108	3671666
47400	0.259309	953630	3677586
47500	0.259304	953886	3678642
47600	0.259207	951760	3671807
47700	0.259221	951436	3670360
47800	0.259397	951459	3667960
47900	0.259253	950216	3665209
48000	0.259228	951352	3669939
48100	0.259332	952274	3672022
48200	0.258834	949484	3668312
48300	0.259105	950637	3668921
48400	0.258832	949601	3668792
48500	0.258813	948227	3663749
48600	0.258837	948872	3665904
48700	0.258954	947779	3660030
48800	0.258735	948075	3664265
48900	0.258717	947598	3662683
49000	0.258659	947596	3663491
49100	0.258411	946835	3664071
49200	0.258694	948079	3664864
49300	0.258464	947449	3665693
49400	0.25838	946965	3665002
49500	0.258329	947326	3667128
49600	0.258397	945314	3658373
49700	0.258186	945015	3660209
49800	0.257841	943291	3658413
49900	0.258269	945690	3661643
50000	0.258486	946233	3660674
50100	0.25838	945074	3657687
50200	0.258019	945131	3663022
50300	0.25827	945101	3659359
50400	0.258082	943923	3657449
50500	0.257755	942370	3656062
50600	0.25767	941956	3655661
50700	0.257664	942300	3657086
50800	0.257427	941274	3656468
50900	0.25776	941084	3651013
51000	0.257504	941180	3655006
51100	0.257468	939879	3650470
51200	0.257736	942070	3655169
51300	0.257875	942644	3655435
51400	0.257407	941168	3656343
51500	0.257584	941374	3654632
51600	0.257496	942429	3659972
51700	0.257177	941177	3659650
51800	0.257036	939550	3655330
51900	0.257258	942110	3662113
52000	0.256962	939330	3655521
52100	0.257302	940720	3656092
52200	0.257284	940540	3655646
52300	0.2571	939900	3655772
52400	0.257032	939303	3654419
52500	0.256857	937808	3651086
52600	0.256782	939238	3657718
52700	0.256827	938584	3654539
52800	0.256878	938639	3654035
52900	0.256867	937238	3648735
53000	0.256713	937599	3652319
53100	0.256846	937296	3649251
53200	0.256412	935888	3649939
53300	0.256538	935854	3648012
53400	0.256825	936975	3648301
53500	0.256056	933518	3645751
53600	0.256266	936000	3652453
53700	0.256483	936126	3649856
53800	0.256429	935294	3647383
53900	0.256548	936006	3648466
54000	0.256397	934615	3645188
54100	0.256424	935182	3647008
54200	0.256647	935179	3643827
54300	0.256332	935245	3648566
54400	0.256153	933478	3644215
54500	0.256484	936223	3650222
54600	0.256376	935228	3647874
54700	0.256362	934513	3645287
54800	0.25627	934683	3647260
54900	0.255924	934072	3649800
55000	0.256269	935131	3649019
55100	0.256039	933962	3647738
55200	0.256312	934612	3646379
55300	0.255892	933591	3648378
55400	0.255895	933672	3648648
55500	0.256097	935261	3651980
55600	0.256389	935942	3650477
55700	0.256038	934009	3647934
55800	0.255715	931427	3642434
55900	0.255879	932337	3643672
56000	0.255773	932782	3646909
56100	0.25565	932074	3645900
56200	0.255809	932946	3647043
56300	0.255991	932904	3644283
56400	0.255739	931117	3640892
56500	0.255717	933019	3648639
56600	0.255265	931265	3648233
56700	0.255375	931134	3646141
56800	0.255184	929600	3642860
56900	0.25539	930635	3643975
57000	0.255641	932070	3646011
57100	0.255088	930248	3646776
57200	0.255265	930240	3644215
57300	0.255257	930544	3645523
57400	0.255219	931540	3649969
57500	0.255523	931451	3645267
57600	0.255074	929924	3645706
57700	0.25488	929248	3645825
57800	0.255016	929443	3644649
57900	0.2548	929197	3646765
58000	0.254581	928721	3648029
58100	0.254703	929197	3648164
58200	0.254688	929390	3649134
58300	0.255024	930606	3649094
58400	0.255229	930175	3644476
58500	0.254872	929583	3647252
58600	0.254675	929721	3650621
58700	0.254583	928285	3646300
58800	0.254625	928456	3646367
58900	0.254431	926596	3641843
59000	0.254427	926545	3641694
59100	0.254408	927712	3646551
59200	0.254508	927595	3644655
59300	0.254055	924725	3639857
59400	0.253925	925260	3643830
59500	0.254469	926754	3641909
59600	0.254326	926631	3643473
59700	0.254379	926672	3642878
59800	0.254022	925218	3642272
59900	0.253816	924553	3642612
60000	0.253643	923774	3642020
60100	0.254419	927705	3646363
60200	0.253898	925736	3646100
60300	0.253884	925180	3644105
60400	0.253668	924306	3643762
60500	0.25431	925684	3639988
60600	0.254125	927406	3649405
60700	0.253944	924864	3641997
60800	0.253943	926931	3650153
60900	0.254116	926202	3644801
61000	0.253772	924950	3644806
61100	0.25388	925120	3643926
61200	0.253843	925413	3645613
61300	0.253269	923286	3645472
61400	0.253535	924210	3645289
61500	0.253569	924495	3645926
61600	0.253272	923863	3647704
61700	0.253399	924471	3648278
61800	0.25327	923312	3645571
61900	0.253061	923347	3648708
62000	0.253339	925061	3651467
62100	0.253378	925000	3650671
62200	0.253069	923483	3649135
62300	0.253015	922869	3647487
62400	0.253129	922301	3643603
62500	0.252935	921731	3644146
62600	0.252941	920252	3638205
62700	0.25331	922627	3642288
62800	0.253286	921645	3638749
62900	0.252643	918972	3637437
63000	0.252683	920325	3642207
63100	0.253025	921817	3643185
63200	0.253021	921663	3642636
63300	0.252931	920804	3640527
63400	0.252474	918220	3636885
63500	0.252543	919575	3641265
63600	0.25245	918813	3639583
63700	0.252566	919207	3639480
63800	0.252436	918935	3640264
63900	0.252471	918327	3637358
64000	0.252576	917906	3634182
64100	0.252421	917490	3634759
64200	0.252685	918684	3635688
64300	0.252408	918013	3637026
64400	0.252326	916969	3634068
64500	0.252639	917929	3633365
64600	0.252421	917235	3633750
64700	0.251991	914142	3627673
64800	0.252157	915008	3628728
64900	0.252353	915823	3629140
65000	0.252302	916210	3631410
65100	0.252106	914793	3628598
65200	0.252313	914475	3624360
65300	0.251893	914145	3629102
65400	0.252328	916295	3631367
65500	0.2515	913345	3631586
65600	0.251667	912410	3625468
65700	0.251602	912188	3625526
65800	0.251475	911150	3623215
65900	0.251459	912210	3627673
66000	0.251603	912717	3627610
66100	0.251868	913390	3626458
66200	0.251453	911836	3626274
66300	0.251137	910402	3625125
66400	0.25156	912059	3625611
66500	0.251349	911675	3627133
66600	0.251513	911040	3622233
66700	0.251557	912064	3625680
66800	0.251526	910807	3621121
66900	0.251545	911208	3622442
67000	0.250999	908220	3618423
67100	0.251298	910080	3621511
67200	0.251135	908262	3616630
67300	0.250918	907776	3617824
67400	0.250614	907421	3620783
67500	0.250749	907655	3619774
67600	0.250587	906583	3617842
67700	0.251152	908691	3618087
67800	0.251287	908337	3614736
67900	0.250776	907216	3617638
68000	0.251032	908689	3619814
68100	0.250777	907752	3619765
68200	0.250985	908547	3619922
68300	0.250904	907664	3617570
68400	0.250901	907782	3618088
68500	0.250619	907330	3620360
68600	0.250526	907548	3622567
68700	0.250379	906724	3621411
68800	0.250669	907295	3619496
68900	0.250295	905710	3618567
69000	0.250223	904487	3614729
69100	0.250489	906384	3618456
69200	0.250558	905579	3614252
69300	0.250584	904948	3611361
69400	0.250544	905540	3614296
69500	0.250588	906409	3617125
69600	0.250399	904812	3613482
69700	0.250136	904630	3616553
69800	0.250299	905839	3619029
69900	0.250352	906515	3620961
70000	0.250271	905931	3619801
70100	0.249932	902719	3611859
70200	0.249881	903070	3613998
70300	0.250189	903706	3612094
70400	0.249863	903034	3614121
70500	0.249745	903576	3617991
70600	0.249549	902552	3616729
70700	0.249791	902787	3614169
70800	0.249682	902626	3615096
70900	0.249878	902949	3613555
71000	0.249454	901385	3613439
71100	0.249688	903392	3618081
71200	0.249556	902841	3617789
71300	0.249626	902994	3617384
71400	0.249488	902537	3617557
71500	0.249813	904075	3619016
71600	0.249596	902404	3615455
71700	0.24974	903723	3618659
71800	0.249732	903567	3618142
71900	0.24953	902350	3616199
72000	0.249393	901833	3616114
72100	0.249518	902089	3615328
72200	0.249722	904072	3620317
72300	0.249308	902410	3619654
72400	0.249621	904090	3621859
72500	0.249099	900861	3616479
72600	0.24949	902005	3615389
72700	0.249625	902768	3616499
72800	0.249077	900951	3617163
72900	0.249099	900761	3616080
73000	0.248779	899769	3616736
73100	0.249324	901234	3614715
73200	0.249491	900946	3611140
73300	0.249259	900146	3611282
73400	0.248982	899805	3613935
73500	0.249052	900159	3614341
73600	0.248973	899574	3613140
73700	0.248561	899200	3617625
73800	0.248859	899398	3614083
73900	0.249303	900274	3611169
74000	0.249098	901044	3617229
74100	0.24864	898987	3615614
74200	0.2489	899891	3615475
74300	0.248665	898053	3611497
74400	0.248373	898202	3616339
74500	0.248902	898975	3611760
74600	0.248727	898819	3613680
74700	0.248627	898116	3612308
74800	0.248719	897729	3609416
74900	0.248597	898183	3613005
75000	0.248717	898072	3610817
75100	0.248504	897253	3610613
75200	0.248801	897572	3607588
75300	0.248567	897409	3610333
75400	0.248417	898038	3615035
75500	0.248445	897983	3614418
75600	0.248462	897958	3614060
75700	0.248566	898714	3615594
75800	0.248711	898932	3614371
75900	0.248588	898886	3615970
76000	0.248428	897471	3612599
76100	0.248127	895292	3608199
76200	0.248562	898251	3613788
76300	0.24848	897932	3613703
76400	0.248245	896752	3612374
76500	0.248258	896229	3610073
76600	0.248448	896900	3610009
76700	0.248498	897056	3609914
76800	0.248311	896870	3611885
76900	0.248171	894634	3604905
77000	0.248501	896416	3607297
77100	0.248638	897175	3608357
77200	0.248336	896666	3610701
77300	0.248266	894601	3603402
77400	0.247518	893004	3607834
77500	0.247735	893565	3606937
77600	0.24818	894404	3603856
77700	0.24787	893534	3604849
77800	0.24772	892392	3602419
77900	0.247974	893611	3603652
78000	0.247551	891206	3600089
78100	0.247827	893005	3603345
78200	0.247872	893357	3604104
78300	0.248053	893152	3600651
78400	0.247749	892643	3603020
78500	0.24788	893092	3602918
78600	0.247909	892127	3598602
78700	0.247632	891071	3598374
78800	0.247731	892616	3603164
78900	0.247817	892624	3601950
79000	0.247685	892410	3603009
79100	0.247422	891364	3602611
79200	0.247723	893419	3606518
79300	0.247619	892095	3602690
79400	0.247369	890138	3598428
79500	0.247523	892107	3604139
79600	0.247334	891964	3606318
79700	0.247589	892187	3603507
79800	0.247207	890194	3601013
79900	0.246836	888717	3600440
80000	0.247078	889666	3600758
80100	0.247137	889820	3600509
80200	0.247199	890192	3601109
80300	0.247233	890758	3602909
80400	0.247093	887932	3593520
80500	0.246976	888772	3598614
80600	0.247245	889180	3596350
80700	0.247149	889699	3599848
80800	0.247272	889381	3596777
80900	0.246874	888958	3600860
81000	0.247181	890653	3603247
81100	0.246794	888682	3600911
81200	0.246843	888626	3599960
81300	0.246687	888411	3601369
81400	0.246521	887130	3598598
81500	0.246859	888640	3599792
81600	0.246828	888535	3599818
81700	0.247144	889672	3599819
81800	0.246891	888416	3598417
81900	0.246997	889272	3600338
82000	0.246599	887343	3598324
82100	0.246625	888657	3603271
82200	0.246887	888093	3597166
82300	0.246795	888291	3599313
82400	0.246898	888260	3597682
82500	0.246675	888369	3601380
82600	0.246727	888084	3599466
82700	0.246674	886891	3595400
82800	0.246527	887590	3600379
82900	0.246678	887347	3597183
83000	0.246561	888747	3604570
83100	0.246893	888666	3599403
83200	0.246836	888055	3597757
83300	0.246812	887855	3597300
83400	0.246664	887789	3599189
83500	0.246573	887194	3598095
83600	0.246453	886103	3595416
83700	0.246496	886543	3596575
83800	0.246497	887175	3599129
83900	0.246514	886616	3596612
84000	0.246093	885418	3597897
84100	0.246499	886320	3595640
84200	0.246296	884465	3591067
84300	0.246316	885231	3593887
84400	0.24629	884689	3592059
84500	0.246291	885147	3593914
84600	0.246183	885001	3594896
84700	0.246049	884041	3592948
84800	0.24584	882725	3590655
84900	0.245855	882025	3587581
85000	0.245733	882580	3591622
85100	0.245933	883059	3590647
85200	0.245917	882354	3588014
85300	0.24584	882499	3589726
85400	0.245944	881586	3584499
85500	0.245606	881714	3589956
85600	0.245518	880897	3587907
85700	0.245645	881380	3588028
85800	0.245604	880949	3586873
85900	0.245626	880701	3585542
86000	0.245611	880546	3585129
86100	0.245236	879819	3587639
86200	0.244967	878173	3584858
86300	0.245318	880705	3590055
86400	0.24525	879328	3585434
86500	0.245194	877753	3579826
86600	0.245201	878302	3581967
86700	0.245164	878627	3583832
86800	0.245205	877422	3578319
86900	0.245048	878198	3583776
87000	0.245216	878366	3582017
87100	0.245025	877772	3582384
87200	0.245146	878475	3583475
87300	0.244922	877864	3584268
87400	0.244864	876975	3581482
87500	0.245226	878087	3580728
87600	0.24486	876798	3580817
87700	0.244883	876004	3577233
87800	0.244882	875571	3575475
87900	0.245041	876181	3575658
88000	0.245286	876519	3573461
88100	0.245009	877569	3581787
88200	0.245337	877688	3577479
88300	0.244811	877067	3582624
88400	0.24442	875794	3583157
88500	0.244715	876264	3580758
88600	0.244338	875147	3581705
88700	0.244721	876088	3579948
88800	0.244339	873644	3575540
88900	0.244608	875276	3578282
89000	0.244161	872902	3575111
89100	0.244354	873624	3575242
89200	0.244366	874831	3580005
89300	0.244208	874305	3580162
89400	0.244457	874883	3578889
89500	0.244227	875115	3583209
89600	0.244294	875140	3582324
89700	0.244251	874631	3580874
89800	0.243993	873680	3580764
89900	0.243841	873040	3580363
90000	0.243977	873623	3580755
90100	0.243925	873671	3581719
90200	0.243862	873611	3582395
90300	0.243996	873811	3581245
90400	0.244111	874508	3582413
90500	0.244178	874207	3580201
90600	0.244078	874217	3581712
90700	0.244098	873798	3579697
90800	0.243828	873317	3581698
90900	0.243903	873143	3579873
91000	0.243804	871972	3576534
91100	0.243817	873221	3581464
91200	0.24391	872829	3578485
91300	0.243532	871517	3578661
91400	0.243787	873269	3582103
91500	0.243946	873845	3582120
91600	0.243615	872042	3579597
91700	0.243575	871704	3578793
91800	0.243593	872780	3582950
91900	0.243469	871578	3579829
92000	0.243481	871971	3581263
92100	0.243657	871852	3578188
92200	0.243683	872741	3581459
92300	0.243665	871536	3576776
92400	0.24347	871506	3579526
92500	0.243525	870127	3573052
92600	0.243571	870864	3575405
92700	0.243334	870247	3576346
92800	0.2435	871921	3580779
92900	0.243452	869596	3571941
93000	0.243493	871111	3577566
93100	0.243383	869718	3573447
93200	0.243631	871291	3576279
93300	0.243335	869222	3572127
93400	0.243096	869292	3575920
93500	0.243519	870867	3576176
93600	0.243048	869327	3576778
93700	0.243006	869177	3576778
93800	0.243091	868117	3571165
93900	0.243118	869723	3577373
94000	0.242886	868581	3576080
94100	0.243026	868584	3574031
94200	0.242759	868285	3576733
94300	0.243057	869916	3579057
94400	0.243001	869399	3577764
94500	0.24276	869945	3583562
94600	0.242884	870318	3583260
94700	0.242913	869689	3580251
94800	0.242925	869562	3579550
94900	0.243015	869613	3578435
95000	0.242959	869392	3578345
95100	0.24312	870065	3578742
95200	0.242604	868228	3578780
95300	0.242995	870345	3581737
95400	0.242668	868458	3578785
95500	0.242976	869984	3580529
95600	0.242551	868852	3582144
95700	0.242735	868959	3579865
95800	0.242541	867721	3577622
95900	0.24261	868356	3579232
96000	0.242404	867011	3576722
96100	0.242621	868083	3577937
96200	0.24256	866328	3571609
96300	0.242802	867911	3574558
96400	0.242429	866529	3574359
96500	0.242747	867459	3573508
96600	0.242461	867205	3576674
96700	0.242876	868518	3575968
96800	0.242635	868475	3579350
96900	0.242423	866913	3576031
97000	0.242202	866314	3576818
97100	0.242648	868542	3579427
97200	0.242502	867652	3577916
97300	0.242398	866707	3575550
97400	0.242503	866999	3575209
97500	0.242493	866463	3573151
97600	0.242053	865470	3575532
97700	0.242157	865644	3574719
97800	0.241925	865779	3578714
97900	0.241935	864257	3572277
98000	0.24212	865333	3573984
98100	0.241927	864268	3572434
98200	0.242234	864737	3569847
98300	0.242311	865198	3570613
98400	0.242088	864258	3570013
98500	0.242341	865695	3572223
98600	0.242183	864489	3569568
98700	0.242456	864940	3567407
98800	0.242425	866403	3573906
98900	0.242079	863819	3568339
99000	0.241954	864496	3572968
99100	0.24225	865609	3573199
99200	0.242275	865635	3572945
99300	0.2423	865479	3571929
99400	0.242205	865884	3575013
99500	0.241844	864408	3574234
99600	0.242053	864700	3572362
99700	0.242	865392	3576007
99800	0.242123	865549	3574827
99900	0.24203	864812	3573154
100000	0.241926	864729	3574358
100100	0.241772	863614	3572014
100200	0.241953	865595	3577541
100300	0.241582	863326	3573633
100400	0.241667	864378	3576737
100500	0.241814	864131	3573540
100600	0.241637	861895	3566903
100700	0.241878	865132	3576727
100800	0.241867	864328	3573574
100900	0.242097	865327	3574297
101000	0.241978	864807	3573911
101100	0.242321	866518	3575902
101200	0.241847	864428	3574272
101300	0.241862	864256	3573338
101400	0.241696	863741	3573658
101500	0.241717	863225	3571230
101600	0.241834	863366	3570084
101700	0.2416	863546	3574277
101800	0.241772	864307	3574888
101900	0.242076	865118	3573753
102000	0.241476	862198	3570535
102100	0.241379	862086	3571499
102200	0.241914	863744	3570452
102300	0.241811	864701	3575944
102400	0.241869	864519	3574327
102500	0.241482	863556	3576070
102600	0.241644	863536	3573585
102700	0.241384	863183	3575969
102800	0.241028	862241	3577352
102900	0.241422	861984	3570451
103000	0.241443	862967	3574201
103100	0.241643	862416	3568969
103200	0.241543	862899	3572450
103300	0.241148	862636	3577201
103400	0.241663	863612	3573622
103500	0.241346	862366	3573149
103600	0.241636	862507	3569451
103700	0.241446	862431	3571938
103800	0.241298	862428	3574123
103900	0.241109	860263	3567936
104000	0.24118	861131	3570486
104100	0.241635	862199	3568195
104200	0.241333	861192	3568483
104300	0.2413	861909	3571934
104400	0.241364	861957	3571197
104500	0.240996	859461	3566281
104600	0.241125	861105	3571194
104700	0.241069	860107	3567885
104800	0.241062	860015	3567613
104900	0.241251	860655	3567473
105000	0.241102	860330	3568328
105100	0.240903	859371	3567285
105200	0.24093	860179	3570243
105300	0.241119	860225	3567641
105400	0.240911	860494	3571836
105500	0.240891	859705	3568848
105600	0.241296	862021	3572462
105700	0.240832	860206	3571817
105800	0.241065	860510	3569624
105900	0.240969	859973	3568806
106000	0.240565	858703	3569524
106100	0.240666	859379	3570842
106200	0.240615	859544	3572283
106300	0.240759	859114	3568349
106400	0.240542	859319	3572436
106500	0.240801	858912	3566895
106600	0.24074	858533	3566223
106700	0.240487	858008	3567795
106800	0.240682	858384	3566459
106900	0.240471	857726	3566863
107000	0.240567	857505	3564520
107100	0.240657	857849	3564607
107200	0.240345	857570	3568078
107300	0.240745	858639	3566597
107400	0.240327	856759	3564976
107500	0.240247	856739	3566072
107600	0.240837	858861	3566145
107700	0.240538	858662	3569751
107800	0.240454	857230	3565043
107900	0.240463	858368	3569640
108000	0.240206	856969	3567641
108100	0.240639	857722	3564343
108200	0.240122	856014	3564916
108300	0.24009	856488	3567369
108400	0.240332	857207	3566764
108500	0.240314	856778	3565243
108600	0.240178	856212	3564903
108700	0.24014	855300	3561676
108800	0.240318	857030	3566235
108900	0.240218	856692	3566308
109000	0.240324	856200	3562690
109100	0.239787	854794	3564801
109200	0.240089	856462	3567265
109300	0.24023	855922	3562932
109400	0.240074	855810	3564773
109500	0.240222	857019	3567607
109600	0.239983	855778	3565994
109700	0.240438	857311	3565623
109800	0.240201	855868	3563131
109900	0.240015	854632	3560747
110000	0.240153	855293	3561452
110100	0.240288	855744	3561322
110200	0.240206	855846	3562963
110300	0.239943	855103	3563782
110400	0.239956	855360	3564659
110500	0.240107	858117	3573894
110600	0.239917	856022	3567993
110700	0.239637	855658	3570645
110800	0.239873	855454	3566274
110900	0.240028	855981	3566169
111000	0.240042	856230	3566992
111100	0.240033	856421	3567932
111200	0.240034	855551	3564287
111300	0.240321	856491	3563939
111400	0.240085	856030	3565525
111500	0.240081	855140	3561878
111600	0.240047	855145	3562402
111700	0.239954	855566	3565547
111800	0.239807	855151	3565996
111900	0.239951	855313	3564524
112000	0.239673	853776	3562255
112100	0.239946	855510	3565432
112200	0.239996	855961	3566572
112300	0.23989	855225	3565071
112400	0.239688	855675	3569950
112500	0.23998	856124	3567486
112600	0.239495	855400	3571680
112700	0.239614	856005	3572432
112800	0.239709	854794	3565973
112900	0.239732	854541	3564562
113000	0.239658	854059	3563654
113100	0.239416	853155	3563485
113200	0.239321	853539	3566509
113300	0.239298	852150	3561035
113400	0.23937	853198	3564343
113500	0.23953	854014	3565380
113600	0.239487	853465	3563723
113700	0.239334	853297	3565295
113800	0.239125	853609	3569722
113900	0.239432	852525	3560618
114000	0.239294	851975	3560371
114100	0.239284	852311	3561921
114200	0.239345	853063	3564149
114300	0.239485	853135	3562373
114400	0.239259	852298	3562243
114500	0.239045	851363	3561524
114600	0.238884	851242	3563417
114700	0.238873	851208	3563434
114800	0.238971	851145	3561705
114900	0.238994	851613	3563320
115000	0.239277	851540	3558796
115100	0.23882	850917	3563003
115200	0.238926	850905	3561375
115300	0.239079	851958	3563504
115400	0.238374	849186	3562406
115500	0.238608	850441	3564178
115600	0.238805	850709	3562367
115700	0.238918	851121	3562401
115800	0.238438	850200	3565700
115900	0.238691	850616	3563665
116000	0.238427	849738	3563935
116100	0.238682	850253	3562281
116200	0.23874	851261	3565640
116300	0.238768	850608	3562492
116400	0.238738	851003	3564588
116500	0.238616	849712	3561006
116600	0.238923	850455	3559527
116700	0.238718	849017	3556570
116800	0.238683	848869	3556475
116900	0.238706	850372	3562424
117000	0.23872	850955	3564652
117100	0.23891	851556	3564340
117200	0.238415	848452	3558713
117300	0.238493	849283	3561033
117400	0.238229	848325	3560958
117500	0.238113	847252	3558196
117600	0.238581	849542	3560805
117700	0.238367	849006	3561764
117800	0.238242	847408	3556920
117900	0.238581	849960	3562564
118000	0.238546	848928	3558764
118100	0.238381	847671	3555957
118200	0.23846	848253	3557212
118300	0.238531	850113	3563958
118400	0.238613	850034	3562402
118500	0.238525	849035	3559516
118600	0.238653	850312	3562966
118700	0.238089	848192	3562499
118800	0.238296	847957	3558416
118900	0.238524	848767	3558415
119000	0.23875	850168	3560913
119100	0.237893	846544	3558504
119200	0.238075	847223	3558639
119300	0.238308	848362	3559944
119400	0.238332	847863	3557486
119500	0.238436	849271	3561845
119600	0.238397	848889	3560827
119700	0.238155	848708	3563685
119800	0.237986	847545	3561320
119900	0.238204	848254	3561047
120000	0.23834	849838	3565657
120100	0.238618	849905	3561778
120200	0.238557	849091	3559278
120300	0.237933	847853	3563410
120400	0.238151	848104	3561208
120500	0.238179	848265	3561457
120600	0.238228	848693	3562519
120700	0.237743	846530	3560692
120800	0.238195	848046	3560309
120900	0.238294	848458	3560546
121000	0.23836	848148	3558260
121100	0.238078	848027	3561973
121200	0.238382	847955	3557123
121300	0.238286	848638	3561431
121400	0.237894	845277	3553162
121500	0.238172	846808	3555446
121600	0.237997	846612	3557232
121700	0.237816	845372	3554726
121800	0.237739	845298	3555579
121900	0.237806	845474	3555318
122000	0.237913	846750	3559081
122100	0.237789	845836	3557082
122200	0.23753	843908	3552851
122300	0.238018	845084	3550504
122400	0.237788	845115	3554069
122500	0.238132	846301	3553920
122600	0.238047	845963	3553766
122700	0.238226	846417	3553007
122800	0.237707	845266	3555924
122900	0.237845	844999	3552728
123000	0.237656	844886	3555083
123100	0.237803	845975	3557461
123200	0.237871	846558	3558904
123300	0.237757	846060	3558511
123400	0.237717	845735	3557742
123500	0.237498	844994	3557896
123600	0.237601	845928	3560296
123700	0.237911	846424	3557728
123800	0.23766	844864	3554926
123900	0.237649	845486	3557708
124000	0.237223	843070	3553918
124100	0.237651	843789	3550544
124200	0.237526	844127	3553828
124300	0.237585	843822	3551668
124400	0.2376	844822	3555643
124500	0.237577	843756	3551511
124600	0.237601	843857	3551573
124700	0.237339	842642	3550370
124800	0.237322	843618	3554748
124900	0.237174	842444	3552016
125000	0.237216	843939	3557685
125100	0.237263	843523	3555224
125200	0.237372	844086	3555962
125300	0.237028	842371	3553896
125400	0.237257	842836	3552418
125500	0.237215	842559	3551872
125600	0.237165	841618	3548658
125700	0.237184	842579	3552428
125800	0.237121	842286	3552135
125900	0.236891	841114	3550644
126000	0.237433	842377	3547843
126100	0.236794	840530	3549625
126200	0.237198	841969	3549648
126300	0.236862	841388	3552225
126400	0.237063	842560	3554167
126500	0.236906	842854	3557749
126600	0.237318	842814	3551408
126700	0.236657	841476	3555681
126800	0.236942	842182	3554387
126900	0.237045	841841	3551405
127000	0.236926	841175	3550362
127100	0.236453	840734	3555606
127200	0.236449	839989	3552517
127300	0.237195	842566	3552211
127400	0.23683	841144	3551683
127500	0.237002	841278	3549666
127600	0.236935	840774	3548535
127700	0.236858	840735	3549527
127800	0.236709	840223	3549596
127900	0.236981	840732	3547683
128000	0.236734	840606	3550851
128100	0.236779	841475	3553841
128200	0.23685	840735	3549656
128300	0.236853	839750	3545451
128400	0.236732	839540	3546375
128500	0.236671	839015	3545076
128600	0.236749	839800	3547218
128700	0.236654	839291	3546487
128800	0.236643	839429	3547233
128900	0.236803	840503	3549378
129000	0.236396	837391	3542320
129100	0.236933	841700	3552475
129200	0.236594	839447	3548043
129300	0.236439	839393	3550146
129400	0.23655	839591	3549318
129500	0.236849	839812	3545763
129600	0.236386	838121	3545557
129700	0.236635	839896	3549329
129800	0.236438	838986	3548438
129900	0.236677	839622	3547541
130000	0.236527	839057	3547399
130100	0.236477	839096	3548319
130200	0.236101	837467	3547067
130300	0.236143	838294	3549935
130400	0.236561	839751	3549833
130500	0.236354	837858	3544927
130600	0.236234	838166	3548037
130700	0.236573	838690	3545160
130800	0.236135	837902	3548397
130900	0.236509	838877	3546913
131000	0.236325	838291	3547201
131100	0.236051	837889	3549618
131200	0.23639	838572	3547403
131300	0.236319	837223	3542758
131400	0.236211	836537	3541484
131500	0.2362	837288	3544832
131600	0.23604	837637	3548711
131700	0.236129	837501	3546800
131800	0.236503	838642	3546014
131900	0.236211	837479	3545464
132000	0.236186	838256	3549131
132100	0.236103	837888	3548826
132200	0.236366	838848	3548932
132300	0.236154	837746	3547462
132400	0.235839	836388	3546433
132500	0.236188	838564	3550405
132600	0.236133	838060	3549094
132700	0.236089	837072	3545578
132800	0.235538	836237	3550325
132900	0.235857	837206	3549638
133000	0.235696	836033	3547076
133100	0.235498	835242	3546711
133200	0.235823	837140	3549860
133300	0.236084	838173	3550318
133400	0.235359	835073	3548085
133500	0.235618	835887	3547638
133600	0.235684	836551	3549454
133700	0.235653	835905	3547183
133800	0.235772	836272	3546957
133900	0.235682	835085	3543267
134000	0.235665	835226	3544117
134100	0.236167	836445	3541754
134200	0.235932	836377	3544996
134300	0.23617	837151	3544699
134400	0.23579	835529	3543535
134500	0.236117	837926	3548779
134600	0.235871	837003	3548569
134700	0.236258	837275	3543901
134800	0.235877	836627	3546882
134900	0.235509	834060	3541515
135000	0.235473	834436	3543662
135100	0.235701	834332	3539790
135200	0.235531	834147	3541566
135300	0.235619	834010	3539659
135400	0.235253	834494	3547216
135500	0.23551	835031	3545623
135600	0.235573	834506	3542447
135700	0.23549	834215	3542458
135800	0.235548	834274	3541835
135900	0.235781	834826	3540692
136000	0.235737	835746	3545247
136100	0.235863	835485	3542244
136200	0.235358	833255	3540365
136300	0.235236	833477	3543155
136400	0.235173	832626	3540479
136500	0.235197	832160	3538135
136600	0.235416	833715	3541452
136700	0.235048	831606	3538028
136800	0.235233	831944	3536680
136900	0.23538	833386	3540601
137000	0.235067	831935	3539138
137100	0.235292	833505	3542428
137200	0.234985	831862	3540066
137300	0.23499	832259	3541673
137400	0.234778	831314	3540848
137500	0.235036	832982	3544055
137600	0.235303	832950	3539907
137700	0.235068	832149	3540032
137800	0.235266	834016	3544992
137900	0.235037	832339	3541312
138000	0.235148	833292	3543693
138100	0.23552	833755	3540064
138200	0.234916	832201	3542545
138300	0.235483	833991	3541616
138400	0.234936	831506	3539289
138500	0.235306	832726	3538908
138600	0.23485	832019	3542761
138700	0.235429	833179	3538985
138800	0.235055	833068	3544147
138900	0.23475	831938	3543931
139000	0.234968	832524	3543146
139100	0.234917	833160	3546618
139200	0.234503	831877	3547403
139300	0.235185	833954	3545941
139400	0.234896	832378	3543596
139500	0.235369	833309	3540437
139600	0.23514	831807	3537500
139700	0.235162	832211	3538882
139800	0.23461	830299	3539067
139900	0.234591	829964	3537917
140000	0.23462	829713	3536418
140100	0.234976	831405	3538257
140200	0.234774	830386	3536966
140300	0.234622	829511	3535516
140400	0.23473	830298	3537255
140500	0.234427	828282	3533227
140600	0.234719	829444	3533776
140700	0.234502	829235	3536153
140800	0.234257	827916	3534218
140900	0.234539	829161	3535273
141000	0.234317	829205	3538820
141100	0.234221	828808	3538574
141200	0.234143	828382	3537927
141300	0.2342	828585	3537943
141400	0.233949	827164	3535658
141500	0.234289	828244	3535138
141600	0.234475	828706	3534303
141700	0.234015	827788	3537328
141800	0.234171	828390	3537542
141900	0.234157	827924	3535769
142000	0.233797	825927	3532670
142100	0.234281	827857	3533606
142200	0.234179	828593	3538294
142300	0.233931	827167	3535947
142400	0.234067	826258	3530004
142500	0.234084	826819	3532153
142600	0.233987	825701	3528835
142700	0.234182	826663	3530008
142800	0.233831	826036	3532625
142900	0.233757	825279	3530497
143000	0.233865	826770	3535250
143100	0.233811	825836	3532058
143200	0.234245	827790	3533857
143300	0.233716	825180	3530688
143400	0.233824	826048	3532771
143500	0.233955	827015	3534926
143600	0.233787	826115	3533620
143700	0.233377	823859	3530162
143800	0.233927	826861	3534701
143900	0.234047	827270	3534629
144000	0.233422	824941	3534119
144100	0.233852	826736	3535294
144200	0.233878	826598	3534321
144300	0.233637	826291	3536642
144400	0.233416	824802	3533622
144500	0.233561	824934	3531991
144600	0.233566	824570	3530354
144700	0.233537	825361	3534174
144800	0.23383	825118	3528709
144900	0.233324	823372	3528872
145000	0.234095	826443	3530381
145100	0.23345	824576	3532127
145200	0.233527	825084	3533142
145300	0.233762	826233	3534503
145400	0.233633	823961	3526734
145500	0.234012	826221	3530682
145600	0.233756	824429	3526875
145700	0.233851	824881	3527372
145800	0.233526	823742	3527402
145900	0.233232	821548	3522445
146000	0.233456	823241	3526323
146100	0.233478	823187	3525764
146200	0.23335	822698	3525603
146300	0.233907	824552	3525124
146400	0.233779	825032	3529116
146500	0.233466	823677	3528036
146600	0.233368	824045	3531092
146700	0.233606	824191	3528127
146800	0.233117	822921	3530074
146900	0.233317	823000	3527382
147000	0.233193	821708	3523729
147100	0.233446	822958	3525263
147200	0.233631	823063	3522925
147300	0.233317	822261	3524216
147400	0.233138	821661	3524350
147500	0.233585	823724	3526448
147600	0.233134	821761	3524850
147700	0.233253	823507	3530533
147800	0.232833	821378	3527759
147900	0.23305	821547	3525195
148000	0.233247	822942	3528197
148100	0.232822	821282	3527513
148200	0.233112	821440	3523803
148300	0.233064	822177	3527685
148400	0.233033	821570	3525554
148500	0.233051	821238	3523846
148600	0.232842	820508	3523890
148700	0.232989	821235	3524785
148800	0.233139	821323	3522889
148900	0.233173	822236	3526299
149000	0.233062	820612	3520996
149100	0.233167	820580	3519285
149200	0.23316	820587	3519417
149300	0.23316	821106	3521643
149400	0.233006	821084	3523871
149500	0.232789	819752	3521439
149600	0.23316	821536	3523486
149700	0.232896	820301	3522180
149800	0.232799	819740	3521243
149900	0.232928	821679	3527610
150000	0.232638	820775	3528126
150100	0.232821	820418	3523818
150200	0.233008	821611	3526115
150300	0.232926	821213	3525643
150400	0.232506	819719	3525575
150500	0.232548	820456	3528120
150600	0.232804	820161	3522965
150700	0.232538	820448	3528229
150800	0.233211	822864	3528408
150900	0.232898	820844	3524477
151000	0.232475	818608	3521272
151100	0.232905	820276	3521932
151200	0.232989	820213	3520395
151300	0.232298	817969	3521199
151400	0.232552	818337	3518939
151500	0.232285	817757	3520493
151600	0.232751	819843	3522409
151700	0.232776	819605	3521000
151800	0.232639	820849	3528427
151900	0.232519	819459	3524272
152000	0.232687	819821	3523271
152100	0.232589	819158	3521909
152200	0.232753	819486	3520840
152300	0.232634	818951	3520339
152400	0.232912	820146	3521277
152500	0.232791	820583	3524978
152600	0.232814	819224	3518799
152700	0.232612	818573	3519052
152800	0.23281	819235	3518904
152900	0.232578	818714	3520170
153000	0.232552	818597	3520067
153100	0.232572	819278	3522678
153200	0.232264	817743	3520753
153300	0.232614	818843	3520174
153400	0.232362	818403	3522109
153500	0.232437	818101	3519665
153600	0.232422	817654	3517978
153700	0.232344	817552	3518707
153800	0.232617	817853	3515877
153900	0.232419	817834	3518793
154000	0.23251	818663	3520980
154100	0.232323	817863	3520367
154200	0.232443	817917	3518789
154300	0.232316	817511	3518956
154400	0.232541	817722	3516470
154500	0.232321	818045	3521187
154600	0.232398	816724	3514328
154700	0.232249	817948	3521864
154800	0.232052	817324	3522163
154900	0.232335	816914	3516102
155000	0.232105	816533	3517938
155100	0.232228	817238	3519117
155200	0.232306	817629	3519612
155300	0.232377	817696	3518834
155400	0.232178	816538	3516854
155500	0.232131	817342	3521045
155600	0.232324	818224	3521912
155700	0.23243	818751	3522576
155800	0.231961	815679	3516446
155900	0.232008	816349	3518623
156000	0.23231	818284	3522387
156100	0.232487	818941	3522522
156200	0.231979	815902	3517130
156300	0.232219	816204	3514798
156400	0.232075	815985	3516038
156500	0.232028	815636	3515244
156600	0.232271	816689	3516107
156700	0.232048	817454	3522782
156800	0.231959	816067	3518159
156900	0.231947	815703	3516760
157000	0.232253	816861	3517118
157100	0.23202	816339	3518405
157200	0.231944	816793	3521506
157300	0.231818	816081	3520356
157400	0.231674	814710	3516628
157500	0.23197	816631	3520423
157600	0.232211	816877	3517827
157700	0.232273	817459	3519390
157800	0.231954	815737	3516807
157900	0.232001	816518	3519454
158000	0.231692	815861	3521324
158100	0.231834	814765	3514435
158200	0.231932	815264	3515100
158300	0.231615	813351	3511645
158400	0.231937	814446	3511492
158500	0.231721	814192	3513672
158600	0.231897	814494	3512306
158700	0.231381	812418	3511173
158800	0.231528	812843	3510773
158900	0.231461	812989	3512415
159000	0.23158	813298	3511949
159100	0.231677	814125	3514050
159200	0.231231	812930	3515659
159300	0.231491	814521	3518592
159400	0.231342	814034	3518739
159500	0.231522	812809	3510712
159600	0.2318	815184	3516754
159700	0.231263	812642	3513928
159800	0.231301	812712	3513659
159900	0.231256	813444	3517501
160000	0.231429	813574	3515436
160100	0.231196	810976	3507749
160200	0.231245	812992	3515723
160300	0.231236	813380	3517525
160400	0.231421	813987	3517338
160500	0.231496	814296	3517541
160600	0.231237	813205	3516754
160700	0.231231	813145	3516597
160800	0.231343	813428	3516113
160900	0.231183	813654	3519519
161000	0.231238	813193	3516688
161100	0.2312	812838	3515742
161200	0.230594	811134	3517583
161300	0.231394	814880	3521608
161400	0.231621	815154	3519340
161500	0.231067	812363	3515706
161600	0.231034	812967	3518824
161700	0.231377	813384	3515402
161800	0.231032	812906	3518588
161900	0.231202	813278	3517611
162000	0.231418	813036	3513275
162100	0.231554	813610	3513691
162200	0.231253	812526	3513585
162300	0.231408	813366	3514858
162400	0.231317	813387	3516339
162500	0.23128	813357	3516767
162600	0.231325	813173	3515279
162700	0.231282	812621	3513549
162800	0.230881	810270	3509475
162900	0.23086	809897	3508176
163000	0.231247	812516	3513635
163100	0.231329	812728	3513292
163200	0.23149	813130	3512587
163300	0.231017	810103	3506690
163400	0.231096	810590	3507593
163500	0.230922	810261	3508808
163600	0.231393	812058	3509434
163700	0.231126	811902	3512810
163800	0.230815	809629	3507697
163900	0.231109	810934	3508879
164000	0.231157	811510	3510653
164100	0.230958	810577	3509636
164200	0.230682	810544	3513682
164300	0.230803	810279	3510699
164400	0.230883	810727	3511428
164500	0.230769	809923	3509664
164600	0.230888	810212	3509112
164700	0.230908	809341	3505042
164800	0.230763	809133	3506335
164900	0.230939	810884	3511252
165000	0.23066	809894	3511201
165100	0.230276	807737	3507686
165200	0.230187	807260	3506975
165300	0.230775	809175	3506331
165400	0.230695	809474	3508852
165500	0.230538	809165	3509898
165600	0.23086	810472	3510666
165700	0.230538	809697	3512205
165800	0.230662	810355	3513165
165900	0.230609	809469	3510144
166000	0.230191	807215	3506713
166100	0.23059	808808	3507554
166200	0.230592	808781	3507414
166300	0.230176	807858	3509737
166400	0.230215	808066	3510057
166500	0.230507	808500	3507489
166600	0.230426	808726	3509706
166700	0.230114	808888	3515162
166800	0.230166	808505	3512701
166900	0.230723	810245	3511763
167000	0.230326	808389	3509762
167100	0.230382	808290	3508474
167200	0.230451	809013	3510570
167300	0.230269	807712	3507691
167400	0.230557	808455	3506527
167500	0.230304	808721	3511531
167600	0.230293	808648	3511391
167700	0.230338	808604	3510506
167800	0.230357	807709	3506332
167900	0.230247	807797	3508386
168000	0.230398	807544	3504997
168100	0.230193	807447	3507703
168200	0.229943	807031	3509696
168300	0.230151	806727	3505207
168400	0.230091	806981	3507229
168500	0.230308	808213	3509267
168600	0.230377	807380	3504596
168700	0.230352	807823	3506910
168800	0.230077	807163	3508236
168900	0.230188	806840	3505129
169000	0.230209	806871	3504950
169100	0.230199	807162	3506373
169200	0.230238	807623	3507776
169300	0.230017	807801	3511919
169400	0.230192	808044	3510303
169500	0.229954	806912	3509006
169600	0.230284	808357	3510266
169700	0.230067	807098	3508095
169800	0.229965	807133	3509814
169900	0.229897	805261	3502700
170000	0.230097	806788	3506289
170100	0.230121	806663	3505395
170200	0.229964	806907	3508834
170300	0.230073	807414	3509378
170400	0.229758	806124	3508576
170500	0.229841	806811	3510307
170600	0.229961	805919	3504584
170700	0.230499	807732	3504280
170800	0.230156	805745	3500860
170900	0.230096	806620	3505578
171000	0.230129	806082	3502744
171100	0.229611	805890	3509808
171200	0.229751	805969	3508013
171300	0.229992	806719	3507592
171400	0.229902	806393	3507550
171500	0.22976	806013	3508067
171600	0.229819	806477	3509182
171700	0.229688	805656	3507614
171800	0.229467	805145	3508756
171900	0.229836	806517	3509092
172000	0.229716	806016	3508747
172100	0.229576	804864	3505872
172200	0.229713	806530	3511034
172300	0.229519	804892	3506859
172400	0.229827	805906	3506578
172500	0.229974	807134	3509678
172600	0.229615	806485	3512334
172700	0.230089	807329	3508767
172800	0.229635	806401	3511655
172900	0.229633	806389	3511637
173000	0.229951	807079	3509788
173100	0.230074	806553	3505631
173200	0.230279	807277	3505647
173300	0.229933	806543	3507734
173400	0.22967	805384	3506707
173500	0.229675	806068	3509609
173600	0.229644	805101	3505871
173700	0.22969	804926	3504404
173800	0.229811	806720	3510368
173900	0.229921	807145	3510531
174000	0.229592	805503	3508409
174100	0.229722	805340	3505722
174200	0.229504	805344	3509058
174300	0.22942	804208	3505391
174400	0.229243	803782	3506245
174500	0.229655	804783	3504304
174600	0.22948	803114	3499710
174700	0.229299	802659	3500488
174800	0.229641	804613	3503784
174900	0.229061	801687	3499882
175000	0.229637	804979	3505436
175100	0.229293	803511	3504297
175200	0.229201	803619	3506173
175300	0.229423	803692	3503109
175400	0.229245	803088	3503180
175500	0.229395	804259	3505995
175600	0.229395	804429	3506738
175700	0.229417	803578	3502696
175800	0.229464	804362	3505399
175900	0.229459	804004	3503917
176000	0.229313	803011	3501817
176100	0.229305	804941	3510352
176200	0.229493	804174	3504133
176300	0.2295	805418	3509445
176400	0.229475	803761	3502604
176500	0.228966	801794	3501810
176600	0.229159	803842	3507801
176700	0.229284	803017	3502275
176800	0.229278	802575	3500446
176900	0.229287	802760	3501116
177000	0.229075	802834	3504682
177100	0.229265	803183	3503293
177200	0.229459	803942	3503643
177300	0.229142	802281	3501232
177400	0.229196	802681	3502167
177500	0.229334	803917	3505445
177600	0.228989	802143	3502984
177700	0.229091	802594	3503384
177800	0.22912	803077	3505042
177900	0.229236	802764	3501905
178000	0.229441	803712	3502907
178100	0.22912	801967	3500207
178200	0.229237	803616	3505613
178300	0.228901	801500	3501504
178400	0.229565	804257	3503403
178500	0.228911	802590	3506129
178600	0.229078	803530	3507670
178700	0.229076	802546	3503400
178800	0.229197	803221	3504504
178900	0.229168	801950	3499397
179000	0.22919	802230	3500281
179100	0.229116	802678	3503362
179200	0.22887	801246	3500871
179300	0.229074	801917	3500694
179400	0.228566	800578	3502609
179500	0.228874	801174	3500508
179600	0.228926	801844	3502632
179700	0.229124	802178	3501059
179800	0.229026	802927	3505839
179900	0.228916	802501	3505656
180000	0.22909	801985	3500738
180100	0.228923	801111	3499477
180200	0.229052	801407	3498793
180300	0.22892	800532	3496992
180400	0.228791	801388	3502713
180500	0.22899	801303	3499290
180600	0.228719	800622	3500456
180700	0.228477	800005	3501467
180800	0.228933	801570	3501337
180900	0.228318	799275	3500712
181000	0.22873	800442	3499502
181100	0.228588	799550	3497780
181200	0.228565	800712	3503209
181300	0.228639	800879	3502804
181400	0.228536	799567	3498642
181500	0.228948	801690	3501633
181600	0.228639	800078	3499299
181700	0.228709	800269	3499075
181800	0.22847	799831	3500818
181900	0.228529	800206	3501551
182000	0.228617	800230	3500314
182100	0.228503	800152	3501719
182200	0.228638	800690	3501998
182300	0.228293	799732	3503093
182400	0.228344	799448	3501070
182500	0.228777	800969	3501085
182600	0.228531	800973	3504880
182700	0.228742	801791	3505227
182800	0.228237	800304	3506459
182900	0.228183	799817	3505159
183000	0.228377	800544	3505367
183100	0.228468	799737	3500439
183200	0.228281	799949	3504221
183300	0.227982	799144	3505295
183400	0.228542	800788	3503898
183500	0.228131	799793	3505843
183600	0.228353	800027	3503463
183700	0.228658	800015	3498740
183800	0.228425	799240	3498915
183900	0.228548	799707	3499079
184000	0.228173	799594	3504330
184100	0.227987	798065	3500480
184200	0.227783	798667	3506257
184300	0.227869	798354	3503561
184400	0.227809	799529	3509651
184500	0.227886	800372	3512159
184600	0.227943	799650	3508116
184700	0.22787	798241	3503050
184800	0.228065	798950	3503167
184900	0.228089	799760	3506342
185000	0.228014	799917	3508200
185100	0.227901	798248	3502604
185200	0.227618	797040	3501651
185300	0.227868	797924	3501694
185400	0.227888	798549	3504124
185500	0.227941	798598	3503531
185600	0.227846	797829	3501619
185700	0.227992	798808	3503673
185800	0.22827	799696	3503289
185900	0.228028	798315	3500954
186000	0.227869	797748	3500903
186100	0.22759	797126	3502466
186200	0.228084	798468	3500771
186300	0.227693	797186	3501139
186400	0.227823	797563	3500808
186500	0.227729	795827	3494617
186600	0.227694	797871	3504138
186700	0.227692	797191	3501185
186800	0.227802	797821	3502255
186900	0.228054	799336	3505024
187000	0.227992	797866	3499536
187100	0.227886	799520	3508422
187200	0.227641	797467	3503174
187300	0.227697	797584	3502825
187400	0.227792	798063	3503476
187500	0.227653	796630	3499321
187600	0.227682	797566	3502976
187700	0.22779	798340	3504717
187800	0.227636	797425	3503063
187900	0.227684	798208	3505762
188000	0.22765	797826	3504622
188100	0.227534	797144	3503403
188200	0.227706	798016	3504590
188300	0.227594	797538	3504214
188400	0.227463	796202	3500349
188500	0.227245	796092	3503233
188600	0.227337	797214	3506749
188700	0.227352	796963	3505412
188800	0.227543	797251	3503739
188900	0.227734	797551	3502116
189000	0.227104	795379	3502264
189100	0.227486	796692	3502158
189200	0.22748	796301	3500537
189300	0.227663	797949	3504959
189400	0.227406	797733	3507968
189500	0.227509	797226	3504149
189600	0.227183	796204	3504682
189700	0.227171	796549	3506386
189800	0.227313	798274	3511778
189900	0.227395	798083	3509675
190000	0.227327	796505	3503782
190100	0.227254	796759	3506020
190200	0.227494	797704	3506484
190300	0.227591	798322	3507709
190400	0.227655	799343	3511209
190500	0.227201	797003	3507914
190600	0.227116	796015	3504878
190700	0.227087	796243	3506328
190800	0.2275	797020	3503385
190900	0.227291	798464	3512958
191000	0.227525	799477	3513798
191100	0.227244	797735	3510480
191200	0.227246	797077	3507554
191300	0.227149	796227	3505302
191400	0.227071	795941	3505253
191500	0.226983	795725	3505661
191600	0.226861	795142	3504970
191700	0.227091	796141	3505820
191800	0.226996	796591	3509276
191900	0.227171	796978	3508268
192000	0.22707	795349	3502669
192100	0.227154	796911	3508241
192200	0.22705	797504	3512459
192300	0.227026	796719	3509365
192400	0.226698	795144	3507500
192500	0.226772	795242	3506787
192600	0.227175	796839	3507602
192700	0.227058	796470	3507777
192800	0.226765	795068	3506132
192900	0.226865	795099	3504726
193000	0.226845	795737	3507843
193100	0.227064	796780	3509058
193200	0.226797	795281	3506572
193300	0.226721	795249	3507610
193400	0.226584	795280	3509869
193500	0.226692	796167	3512114
193600	0.226541	795344	3510816
193700	0.226795	795489	3507521
193800	0.226711	795481	3508791
193900	0.22703	795623	3504480
194000	0.226812	795475	3507197
194100	0.226727	795378	3508081
194200	0.226854	796040	3509043
194300	0.226864	795591	3506913
194400	0.22662	794496	3505852
194500	0.227096	797632	3512313
194600	0.226703	794851	3506131
194700	0.226805	795796	3508720
194800	0.227143	797434	3510715
194900	0.226947	797052	3512066
195000	0.226964	796680	3510163
195100	0.226835	795967	3509008
195200	0.226711	796365	3512692
195300	0.226551	796578	3516108
195400	0.22677	796581	3512726
195500	0.226877	796626	3511264
195600	0.226817	795755	3508363
195700	0.226723	794759	3505417
195800	0.22676	795924	3509987
195900	0.226702	795455	3508809
196000	0.226679	794863	3506555
196100	0.226577	795768	3512130
196200	0.226638	795962	3512037
196300	0.226654	795859	3511340
196400	0.226747	796151	3511182
196500	0.22641	795617	3514060
196600	0.226888	796265	3509510
196700	0.226817	795594	3507651
196800	0.226681	795425	3509005
196900	0.226745	795674	3509118
197000	0.226947	796807	3510992
197100	0.226786	795987	3509863
197200	0.22621	793017	3505676
197300	0.226628	794942	3507697
197400	0.226429	793998	3506601
197500	0.226477	793216	3502414
197600	0.22632	792966	3503735
197700	0.22649	793810	3504829
197800	0.226254	794009	3509366
197900	0.226227	793397	3507078
198000	0.226263	794200	3510069
198100	0.226141	794184	3511893
198200	0.225798	791849	3506884
198300	0.226092	793321	3508836
198400	0.225934	791210	3501951
198500	0.225895	791148	3502275
198600	0.226054	791926	3503253
198700	0.226168	792319	3503227
198800	0.225849	790174	3498675
198900	0.226285	791402	3497368
199000	0.225726	790025	3499924
[truncated: 1,011 more rows]
