# Supplementary material for: Whole genome sequencing of Aoluguya reindeer (Rangifer tarandus) in China
Source: Front Genet. 2023 Aug 2;14:1243795. doi: 10.3389/fgene.2023.1243795 (PMC10433215; doi:10.3389/fgene.2023.1243795)
Supplement: Supplementary file 2 [file Table3.XLSX]

## Sheet: Sheet1
Sample ID	Accession ID	Description	Country
FeD-1	ERR4290637	Fennoscandian domestic reindeer	Norway
FeD-2	ERR4290638	Fennoscandian domestic reindeer	Norway
FeD-3	ERR4290645	Fennoscandian domestic reindeer	Norway
FeD-4	ERR4290646	Fennoscandian domestic reindeer	Norway
FeW-1	ERR4290650	Fennoscandian wild reindeer	Norway
FeW-2	ERR4290651	Fennoscandian wild reindeer	Norway
FeW-3	ERR4290653	Fennoscandian wild reindeer	Norway
FeW-4	ERR4290654	Fennoscandian wild reindeer	Norway
RuW-1	ERR4290641	Russian wild reindeer	Russia
RuW-2	ERR4290643	Russian wild reindeer	Russia
RuW-3	ERR4290644	Russian wild reindeer	Russia
RuW-4	ERR4290642	Russian wild reindeer	Russia
