# Supplementary material for: Whole genome sequencing of Aoluguya reindeer (Rangifer tarandus) in China
Source: Front Genet. 2023 Aug 2;14:1243795. doi: 10.3389/fgene.2023.1243795 (PMC10433215; doi:10.3389/fgene.2023.1243795)
Supplement: Supplementary file 3 [file Table1.XLSX]

## Sheet: Sheet1
Sample	Library Name	Raw Reads	Clean Reads	Raw Base(G)	Clean Base(G)	Effective(%)	Error(%)	Q20(%)	Q30(%)	GC(%)	mapping ratio(%)	depth
AgD-1	FDSW220016857-1a	312026714	311543648	46.8	46.73	99.85	0.03	96.31	89.67	43.15	99.41	16.6615
AgD-2	FDSW220016867-1a	362039410	360835518	54.31	54.13	99.67	0.03	97.31	91.21	42.81	98.81	19.4336
AgD-3	FDSW220016868-1a	314273144	311382676	47.14	46.71	99.08	0.03	97.65	92.86	42.77	98.6	16.7607
AgD-4	FDSW220016869-1a	273678296	272739154	41.05	40.91	99.66	0.03	97.66	92.19	43.18	99.47	14.4692
AgD-5	FDSW220016871-1a	297284824	296365958	44.59	44.45	99.69	0.03	96.91	90.02	43.17	99.48	15.9949
AgD-6	FDSW220016858-1a	354953648	354424026	53.24	53.16	99.85	0.03	96.55	90.35	42.6	99.06	19.2812
AgD-7	FDSW220016862-1a	233611958	232946066	35.04	34.94	99.71	0.03	97.8	92.79	42.8	99.41	12.7958
AgD-8	FDSW220016863-1a	337629766	337131574	50.64	50.57	99.85	0.03	96.63	90.52	42.48	99.39	18.4108
AgD-9	FDSW220016864-1a	333569482	330397652	50.04	49.56	99.05	0.03	97.74	93.16	42.88	99.41	17.8756
AgD-10	FDSW220016865-1a	308010854	307118322	46.2	46.07	99.71	0.03	97.82	92.89	42.85	99.42	16.7175
